# Supplementary material
Source: PubMed Central journal article supplement (PMC5292285)

**Figure S1. Nucleotide and deduced amino acid sequence from *M. sexta* PLIN2.** cDNA nucleotide (1-1350) sequence, **JF809664.1**, is shown above the deduced amino acid sequence (1-304), **AEJ33049**. Amino acid residues are aligned with the second nucleotide of each codon. The amino acid sequences underlined represents the matched peptides obtained from the MS/MS analysis of *M. sexta* ovary lipid droplets. These peptides are 100% identical to *Bombyx mori* Lsd2 (NP\_001138804). The stop codon TAA is marked by short dash line.

**Figure S2. Protein sequence alignment of vertebrate PLIN2 and MsexPLIN2.** Alignments were produced with Clustal Omega. The sequences identifiers and abbreviations used are: HsPLIN2: *Homo sapiens* perilipin-2 (NP\_001113.2); MmPLIN2: *Mus musculus* perilipin-2 (NP\_031434.3); XIPLIN2: *Xenopus laevis* perilipin 2 (NP\_001081960.1); MsexPLIN2: *Manduca sexta* lipid storage droplet protein 2 or Perilipin 2 (AEJ33049.1).

**Figure S3. A. Protein sequence alignment of PLIN2 from 13 insect species.** Alignments were produced with Clustal Omega. The sequences identifiers and abbreviations used are: Hsal: *Harpegnathos saltator* (EFN86125.1); Mr: *Megachile rotundata* (XP\_003703225.1); Bi: *Bombus impatiens* (XP\_003485735.1); Bt: *Bombus terrestris* (XP\_003397531.1); Am: *Apis mellifera* (XP\_003249235.1); Af: *Apis florea* (XP\_003697663.1); Bm: *Bombix mori* (NP\_001138804.1); Msex: *Manduca sexta* (AEJ33049.1); Cc: *Ceratitis capitata* (XP\_004524967.1); Dm: *Drosophila melanogaster* (NP\_001036276.1); Md: *Musca domestica* (XP\_005188653.1); Aa: *Aedes aegypti* (XP\_001658058.1); Ag: *Anopheles gambiae* (XP\_310971.5)

**Figure S4. Identity matrix of PLIN2 proteins.** The sequences identifiers and abbreviations used are: Hsal: *Harpegnathos saltator* (EFN86125.1); Mr: *Megachile rotundata* (XP\_003703225.1); Bi: *Bombus impatiens* (XP\_003485735.1); Bt: *Bombus terrestris* (XP\_003397531.1); Am: *Apis mellifera* (XP\_003249235.1); Af: *Apis florea* (XP\_003697663.1); Bm: *Bombix mori* (NP\_001138804.1); Msex: *Manduca sexta* (AEJ33049.1); Cc: *Ceratitis capitata* (XP\_004524967.1); Dm: *Drosophila melanogaster* (NP\_001036276.1); Md: *Musca domestica* (XP\_005188653.1); Aa: *Aedes aegypti* (XP\_001658058.1); Ag: *Anopheles gambiae* (XP\_310971.5)

**Figure S5. Supplement to Figure 7, Protein levels of PLIN2 in 5<sup>th</sup>-larval fat body.** A representative PLIN2 western blot (right panel) image with the corresponding Ponceau S staining (left panel) is shown in the figure. Labels: M, molecular weight marker; 1, 2, 3, 4, and 5 correspond to LDs samples from the fat body of 5<sup>th</sup> instar larvae on day 1, 2, 3, 4 and 5, respectively. Alternatively, when the age of the larvae is expressed as a fraction of the total length of the feeding period (5 days), Day 1, 2, 3, 4, and 5 of the 5<sup>th</sup> instar corresponds to fraction 0.2, 0.4, 0.6, 0.8 and 1, respectively.

**Figure S6. Supplement to Figure 8, Effect of low caloric diet on the lipid accumulation and PLIN2 protein levels in 5<sup>th</sup>-larval fat body.** A representative PLIN2 western blot (right panel) image with the corresponding Ponceau S staining (left panel) is shown in the figure. Labels: M, molecular weight marker; 1, 2, 3, 4, 5, 6 and 7 correspond to LDs samples from the fat body of 5<sup>th</sup> instar larvae on day 3, 4, 5, 6, 7 and 8, respectively. Alternatively, when the age of the larvae is expressed as a fraction of the total length of the feeding period (9 days), Day 3, 4, 5, 6, 7, 8 and 9 of the 5<sup>th</sup> instar corresponds to fraction 0.33, 0.44, 0.56, 0.76, 0.89 and 1, respectively.

**Figure S7. Supplement Figure 9, Effect of starvation and refeeding in the expression of PLIN2 in 5<sup>th</sup>-larval fat body.** A representative PLIN2 western blot (right panel) image with the corresponding Ponceau S staining (left panel) of the LDs isolated from the fat body of 5<sup>th</sup> instar larvae under the following conditions: Fed, day 2 feeding (lane 1); Starved, day 2 subjected to 24h starvation (lane 2); Refeeding, day 2, starved for 24h followed by refeeding for 2h (lane 3); 3h (lane 4); and 6h (lane 5) is shown in the figure.

**Figure S8. Supplement Figure 10, Effect of starvation and refeeding in the expression of PLIN2 in the midgut of larvae.** A representative PLIN2 western blot (right panel) image with the corresponding Ponceau S staining (left panel) of the LDs isolated from the fat body of 5<sup>th</sup> instar larvae under the following conditions: Fed, feeding day 2 (lane 1); Starved, day 2, subjected to 24h starvation (lane 2); Refeeding, day 2, starved for 24h followed by refeeding for 2h (lane 3), 6h (lane 4) and 24h (lane 5).

**Figure S1**

<sup>1</sup>gacctggagagtgttctgttaacttagcgcagcagttgatacgttaaagtgcgtaataaatt  
<sup>62</sup>agaaagtaccaatTTTTGTGTTGAATATAATTTAAATCGAAATATGgcaacagaagtgagt  
M A T E V S  
<sup>123</sup>caagcaccggcagcattgccacaattgcagtcagtcagccagaaggccatggccttccccact  
Q A P A A L P Q L Q S V Q K A M A F P T  
<sup>183</sup>gtgggggcagcggtcgaacatggttgagcattctactctaaagtcaaaggagcacactct  
V G A A V E H V G A F Y S K V K G A H S  
<sup>243</sup>ctcctggaatgggactgtccaccgctgaagcgggagtagtgctggcggcatccacagcg  
L L E W A L S T A E A G V V L A A S T A  
<sup>303</sup>gctccctacgtatccgcaccactagcagtcgggtgatgcaaaggctgccgcccgcacatcgac  
A P Y V S A P L A V G D A K V A A A I D  
<sup>363</sup>cagctggagcgcggcgtgccgctcgtcaacgagcagccaaaggctcatcgtcgagactacc  
Q L E R R V P L V N E Q P K V I V E T T  
<sup>423</sup>aaacaagcagtgctttctagaatatcgccgcatgtcaacaaggtttacggagcgcggtgc  
K Q A V L S R I S P H V N K V Y G A R V  
<sup>483</sup>gcggcagaggaacgcgctcaagtcgctgaaggaattatcggtgggccaagcgaacgcggtg  
A A E E R V K S L K E L S W A K A N A L  
<sup>543</sup>ctctctactgcatacggacagaaggcgatgcacggcgtcgactccggcgccacctacgcc  
L S T A Y G Q K A M H G V D S G A T Y A  
<sup>603</sup>atgcagctgctagatcattacctgccgcctgtcgggtgtcactgaggagcgatcaaccgac  
M Q L L D H Y L P P V G V T E E R S T D  
<sup>663</sup>atcccccgtcgacggcggacccggcgctgcacacggtgcaaactgtgggcaggctcagc  
I T P S T A D P A L H T V Q T V G R L S  
<sup>723</sup>gctgtcgccgcgagaaggggtgtgggccaacctcgcttacaagatcaacgagcttagacaa  
A V A A R R V W A N L A Y K I N E L R Q  
<sup>783</sup>actggcatagaactagacgtgcgctcgttatgtgacagcgttgctagccgccctgcacctc  
T G I E L D V R R Y V T A L L A A L H L  
<sup>843</sup>gccaaggtgacgagtcagcagcagcgcgaggagcaggtgcctcctcagcagaacaacgcg  
A K V T S Q Q Q R E E Q V P P Q Q N N A  
<sup>903</sup>gagccctccccctctggcccggagccctcccacaacaccgcgagtcggccccaccacc  
E P S P S G P E P S H N T R E S A P T T  
<sup>963</sup>gctaacaaggtgaaatccacaccggaggcgaaatccgcggagcattcgcaaaattaatca  
A N K V K S T P E A K S A E H S Q N -  
ttatatacctattatatacattttaataaagttttgcatttgtataagtgtaattgcatg  
aacggcttgtattggcattttataaaaggcaatagccgttagtctaccttgcaaatgatt  
ctcctagttgtaagcaagccacaatgccgatacacaggatgtatccacattgttatggct  
gttagtttataagtattttatcatatttacactgtcagtgaagactgtctaagtgtctt  
atatttgtattttatattggcatgaattgtgaagtattttatattggaatgtattttta~~aataa~~  
acaacttatacagcaaaaaaaaaaaaaa<sup>1350</sup>

## Figure S2

### Msex Lsd2 vs PLIN2 from vertebrates

CLUSTAL O(1.2.1) multiple sequence alignment

```

MsexPLIN2      MATEVSQA-PAALPQLQSVQKAMAFPTVGAAVEHVGAFYSKVKGHAHSLLEWALSTAEAGV  59
Xenopous      ----MSAAVEQQEQQQSVVDRIINLPEVSSSTYDMVSSAYTNTKENHPYIKSVCDVAEKSV  56
MmPLIN2       -----MAAAVVDPPQSVVMRVANLPLVSSSTYDLVSSAYVSTKQOYPYLRSVCEMAEKGV  54
HsPLIN-2      -----MASVAVDPQPSVVTRVVNLPLVSSSTYDLMSSAYLSTKQOYPYLKSVCEMAENGV  54
                *      * . * : : * * . . . . . * . . * : : . . . * * . *

MsexPLIN2      VLAASTA----AP---YVSAPLAVGDAKVA AAI DQLERRVPLVNEQPKVIIVETTKQAVL-  111
Xenopous      KSITSVALTSAMPPIIHRLEPQIAIANNIACIGLQKIEEKLPILYQPSDKIVSNASDAVAG  116
MmPLIN2       KTVTSAAMTSALPIIQKLEPQIAVANTYACKGLDRMEERLPIILNQPTSEIVASARGAVTG  114
HsPLIN-2      KTITSVAMTSALPIIQKLEPQIAVANTYACKGLDRIEERLPIILNQPTQIVANAKGAVTG  114
                : * . *      *      : . : * : : . . . : * : * . . . : * : : : * * : . *

MsexPLIN2      -----SRISPHVNKVYGARVA AAEERVKSLKELSWAKANALLSTAYGQK  154
Xenopous      AK-----ETVLQSI TGVVDKTKGAVHDSVEMTKAV---VNGSINTVLGSGVQVQM  162
MmPLIN2       AKDVVTTTTMAGAKDSVASTVSGVVDKTKGAVTGSVERTKSV---VNGSINTVLG--MVQF  169
HsPLIN-2      AKDAVTTTTVTGAKDSVASTITGVMDKTKGAVTGSVEKTKSV---VSGSINTVLGSRMMQL  171
                . : : : * . * * : * . * : : . . * : : * . *

MsexPLIN2      AMHGVDSGATYAMQLLDHYLPPVGVTEERSTDITPST-ADPALHTVQTVGRLSAVAARRV  213
Xenopous      MNTGVNTALTTSENLEQYLPPTDEELAIEAAKTEGFESGKQPNYYVRLGSLSTKARKRA  222
MmPLIN2       MNSGVDNAITKSELLVDQYFPLTQEELEMEAKKVEGFDVMVQKPSNYERLESSTKLCSRA  229
HsPLIN-2      VSSGVENALTKSELLVEQYLP LPT EEEEELEKEAKKVEGFDLVQKPSYYVRLGSLSTKLHSRA  231
                * * : . . * : * : : * : * . . . . . : * * : * .

MsexPLIN2      WANLAYKINELRQTGIELDVRRYVTALLAALHLAKVT-----SQQQREEQVPPQQ--NNA  266
Xenopous      YQQALGRISDAKRSRQE-----AIAQLNKTMDLIEFAKKNVNSANQ-----KLYNTWV  270
MmPLIN2       YHQALSRVKEAKQKSQE-----TISQLHSTVHLIEFARKNMHSANQKIQGAQDKLYVSWV  284
HsPLIN-2      YQQALSRVKEAKQKSQQ-----TISQLHSTVHLIEFARKNVYSANQKIQDAQDKLYLSWV  286
                : : : : : : . . : : * : : * : : : * : * : : . .

MsexPLIN2      EPSPSGPEPSHNTRESAPTTANKVKSTPEAKSAEHSQN-----  304
Xenopous      DWTKSSGDP-----ANEGNESAEQIESRILSMTRNLTQQLQTTCHSLVM  314
MmPLIN2       EWKRSIGYD-----DTDESHCVEHIESRTLAIARNLTQQLQTTCTVTVLV  328
HsPLIN-2      EWKRSIGYD-----DTDESHCAEHIESRTLAIARNLTQQLQTTCHTLLS  330
                : . * . . . . * : : .

MsexPLIN2      -----  304
Xenopous      SVQGLPQNIQDKTHRVGAMAGEMYHNF RSASSLKEVSDNILTNSRGQLQKMKDSMDDVMD  374
MmPLIN2       NAQGLPQNIQDQAKHLGVMAGDIYSVFRNAASFKEVSDGVLTSKGLQKMKESLDEVMD  388
HsPLIN-2      NIQGVQPQNIQDQAKHMGVMAGDIYSVFRNAASFKEVSDSLLTSSKGLQKMKESLDDVMD  390

MsexPLIN2      -----  304
Xenopous      YLVNNTPLNWLVPDF SITDLSSSEM DENPDVLEEDEM EMQDFSRLNGRVVNRDIS  428
MmPLIN2       YFVNNTPLNWLVGPFYPQSTEVNKA--SLKVQQSEVKA-----Q-----  425
HsPLIN-2      YLVNNTPLNWLVGPFYPQLTESQNA--QDQGAEMDKSSQETQRSEHKTH-----  437

```

|              |        |        |        |        |
|--------------|--------|--------|--------|--------|
| 1: MsexPLIN2 | 100.00 | 22.30  | 24.63  | 24.09  |
| 2: Xenopous  | 22.30  | 100.00 | 57.49  | 59.67  |
| 3: MmPLIN2   | 24.63  | 57.49  | 100.00 | 82.59  |
| 4: HsPLIN-2  | 24.09  | 59.67  | 82.59  | 100.00 |



**Figure S4**

**Identity Matrix of Insect PLIN2 Proteins**

|      | Hsal  | Mrot  | Bi    | Bt    | Am    | Af    | Bm    | Msex  | Cc    | Dm    | Md    | Aa    | Ag    |
|------|-------|-------|-------|-------|-------|-------|-------|-------|-------|-------|-------|-------|-------|
| Hsal | 100.0 | 67.6  | 67.7  | 67.3  | 64.0  | 63.3  | 23.7  | 24.1  | 27.0  | 27.8  | 27.0  | 26.7  | 27.5  |
| Mrot | 67.6  | 100.0 | 70.1  | 70.1  | 67.6  | 68.1  | 21.8  | 22.2  | 24.4  | 26.0  | 24.1  | 25.3  | 24.5  |
| Bi   | 67.7  | 70.1  | 100.0 | 98.1  | 81.1  | 80.4  | 24.0  | 24.4  | 28.0  | 29.2  | 27.6  | 28.1  | 27.7  |
| Bt   | 67.3  | 70.1  | 98.1  | 100.0 | 80.3  | 79.6  | 24.0  | 24.4  | 28.4  | 29.6  | 28.0  | 28.1  | 27.7  |
| Am   | 64.0  | 67.6  | 81.1  | 80.3  | 100.0 | 95.4  | 20.9  | 20.1  | 27.8  | 28.6  | 27.8  | 26.7  | 25.1  |
| Af   | 63.3  | 68.1  | 80.4  | 79.6  | 95.4  | 100.0 | 21.6  | 20.8  | 27.7  | 28.5  | 27.7  | 27.0  | 25.4  |
| Bm   | 23.7  | 21.8  | 24.0  | 24.0  | 20.9  | 21.6  | 100.0 | 80.2  | 32.0  | 34.7  | 33.5  | 37.1  | 38.3  |
| Msex | 24.1  | 22.2  | 24.4  | 24.4  | 20.1  | 20.8  | 80.2  | 100.0 | 33.3  | 33.8  | 33.6  | 37.0  | 37.9  |
| Cc   | 27.0  | 24.4  | 28.0  | 28.4  | 27.8  | 27.7  | 32.0  | 33.3  | 100.0 | 72.6  | 79.2  | 55.3  | 54.0  |
| Dm   | 27.8  | 26.0  | 29.2  | 29.6  | 28.6  | 28.5  | 34.7  | 33.8  | 72.6  | 100.0 | 81.1  | 55.9  | 55.4  |
| Md   | 27.0  | 24.1  | 27.6  | 28.0  | 27.8  | 27.7  | 33.5  | 33.6  | 79.2  | 81.1  | 100.0 | 55.5  | 56.7  |
| Aa   | 26.7  | 25.3  | 28.1  | 28.1  | 26.7  | 27.0  | 37.1  | 37.0  | 55.3  | 55.9  | 55.5  | 100.0 | 74.8  |
| Ag   | 27.5  | 24.5  | 27.7  | 27.7  | 25.1  | 25.4  | 38.3  | 37.9  | 54.0  | 55.4  | 56.7  | 74.8  | 100.0 |



FIGURE S7

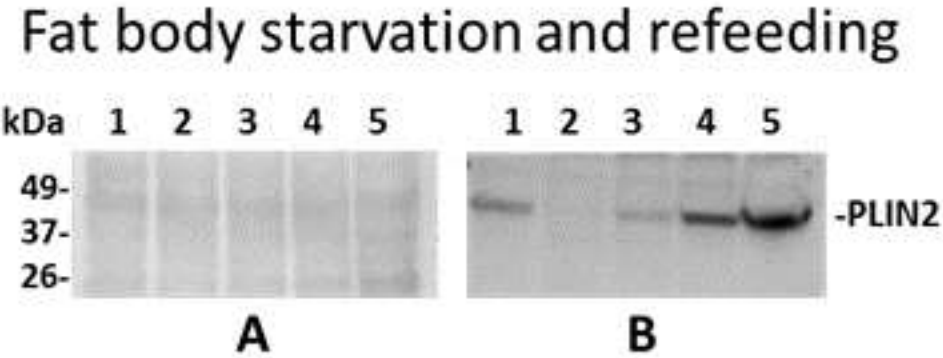

FIGURE S8

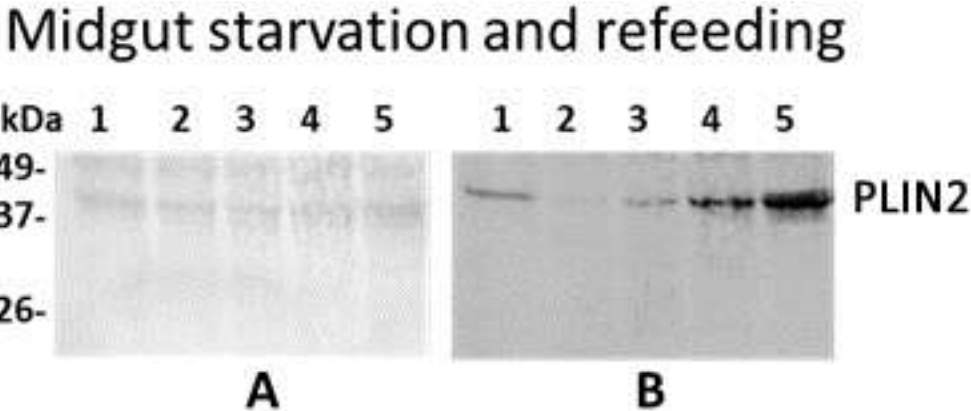

Supplement: NIHMS838347-supplement.pdf [file NIHMS838347-supplement.pdf]
